# Supplementary material for: Exploring the Potential Relationship Between Oxidative Stress in Fertile Individuals and Secondary Infertility: A Comparative Analysis of Proteomic Profiles in Seminal Plasma
Source: Preprints.org preprint supplement (doi:10.20944/preprints202311.0957.v1), 2023-11-15
Supplement: Supplementary file 1 [file supplementary]

**Supplementary Table 1.** Differentially expressed proteins (DEPs) with the normalized spectral abundance factor (NSAF) ratio.

Group1: Healthy fertile Donors.

Group2 :Fertile Donors with high oxidative stress.

| Protein                                                    | accession | Average SC |         | Abundance |         | NSAF ratio<br>Group 2/Group 1 | T-Test<br>P-value | Expression       |
|------------------------------------------------------------|-----------|------------|---------|-----------|---------|-------------------------------|-------------------|------------------|
|                                                            |           | Group 1    | Group 2 | Group 1   | Group 2 |                               |                   |                  |
| T-complex protein 1 subunit delta isoform a                | 38455427  | 2.7        | 0       | VL        | ni      | 0.00                          | 0.00011           | Unique to Lane 1 |
| serine protease inhibitor Kazal-type 2 isoform 1 precursor | 413081531 | 9.7        | 1.3     | L         | VL      | 0.12                          | 0.00297           | Underexpressed   |
| tubulin beta-4B chain                                      | 5174735   | 13.7       | 1.7     | L         | VL      | 0.12                          | 0.00703           | Underexpressed   |
| nucleobindin-2 isoform X1                                  | 578820554 | 22.7       | 3.0     | M         | VL      | 0.13                          | 0.00677           | Underexpressed   |
| peptidyl-prolyl cis-trans isomerase A                      | 10863927  | 10.3       | 3.0     | L         | VL      | 0.21                          | 0.00463           | Underexpressed   |
| lipoprotein lipase precursor                               | 4557727   | 35.7       | 7.0     | M         | VL      | 0.23                          | 0.01928           | Underexpressed   |
| semenogelin-2 precursor                                    | 4506885   | 1321.0     | 409.0   | H         | H       | 0.26                          | 0.00023           | Underexpressed   |
| semenogelin-1 preproprotein                                | 4506883   | 698.7      | 236.3   | H         | H       | 0.26                          | 0.00074           | Underexpressed   |
| heat shock-related 70 protein 2                            | 13676857  | 46.3       | 25.3    | M         | M       | 0.30                          | 0.00554           | Underexpressed   |
| 14-3-3 protein zeta/delta isoform X2                       | 530389317 | 20.3       | 6.3     | M         | VL      | 0.32                          | 0.02786           | Underexpressed   |
| heat shock protein HSP 90-beta isoform c                   | 431822408 | 17.7       | 10.7    | L         | L       | 0.35                          | 0.00026           | Underexpressed   |
| heat shock protein HSP 90-alpha isoform 1                  | 153792590 | 70.0       | 43.0    | M         | M       | 0.36                          | 0.01023           | Underexpressed   |
| endoplasmin precursor                                      | 4507677   | 16.7       | 9.0     | L         | L       | 0.37                          | 0.00602           | Underexpressed   |
| gastric intrinsic factor 1 preproprotein                   | 4505757   | 49.3       | 24.7    | M         | M       | 0.50                          | 0.00149           | Underexpressed   |
| prostate-specific antigen isoform 1 preproprotein          | 4502173   | 321.0      | 225.0   | H         | H       | 0.66                          | 0.00839           | Underexpressed   |
| serum albumin preproprotein                                | 4502027   | 741.0      | 1225.3  | H         | H       | 1.51                          | 0.00583           | Overexpressed    |
| zinc-alpha-2-glycoprotein precursor                        | 4502337   | 206.3      | 272.0   | H         | H       | 1.60                          | 0.03459           | Overexpressed    |
| epididymal secretory protein E1 precursor                  | 5453678   | 85.7       | 146.7   | H         | H       | 1.62                          | 0.03894           | Overexpressed    |
| alpha-2-macroglobulin isoform X1                           | 578822814 | 17.0       | 40.0    | L         | M       | 2.01                          | 0.01423           | Overexpressed    |
| cysteine-rich secretory protein 1 isoform 1 precursor      | 25121982  | 27.3       | 51.0    | M         | M       | 2.05                          | 0.00951           | Overexpressed    |
| glycodelin precursor                                       | 65507501  | 25.0       | 54.7    | M         | M       | 2.19                          | 0.00242           | Overexpressed    |
| neprilysin isoform X1                                      | 578807443 | 15.0       | 31.0    | L         | M       | 2.22                          | 0.03895           | Overexpressed    |
| alpha-1-antitrypsin precursor                              | 189163532 | 129.3      | 196.7   | H         | H       | 2.23                          | 0.02790           | Overexpressed    |
| cathepsin D preproprotein                                  | 4503143   | 39.7       | 65.3    | M         | M       | 2.25                          | 0.00977           | Overexpressed    |
| cartilage acidic protein 1 isoform B precursor             | 330688397 | 23.0       | 44.0    | M         | M       | 2.47                          | 0.00449           | Overexpressed    |
| serpin B6 isoform a                                        | 41152086  | 8.0        | 15.3    | L         | L       | 2.68                          | 0.00424           | Overexpressed    |
| serum amyloid P-component precursor                        | 4502133   | 6.0        | 15.3    | VL        | L       | 2.69                          | 0.00538           | Overexpressed    |
| cytochrome c                                               | 11128019  | 2.7        | 12.0    | VL        | L       | 2.84                          | 0.00550           | Overexpressed    |
| dipeptidyl peptidase 4                                     | 18765694  | 18.3       | 47.0    | L         | M       | 3.10                          | 0.02836           | Overexpressed    |
| alpha-1-antichymotrypsin precursor                         | 50659080  | 40.7       | 106.0   | M         | H       | 3.23                          | 0.00023           | Overexpressed    |
| plasma protease C1 inhibitor precursor                     | 73858570  | 17.7       | 60.7    | L         | M       | 3.30                          | 0.00049           | Overexpressed    |
| peroxiredoxin-4 precursor                                  | 5453549   | 3.0        | 10.0    | VL        | L       | 3.39                          | 0.00099           | Overexpressed    |
| protein S100-A9                                            | 4506773   | 4.0        | 22.7    | VL        | M       | 3.77                          | 0.01707           | Overexpressed    |
| sialate O-acetyltransferase isoform 1 precursor            | 24850115  | 6.7        | 24.3    | VL        | M       | 3.80                          | 0.00592           | Overexpressed    |
| IgGfC-binding protein precursor                            | 154146262 | 16.3       | 77.7    | L         | M       | 5.98                          | 0.00010           | Overexpressed    |
| haptoglobin isoform 2 preproprotein                        | 186910296 | 1.7        | 10.3    | VL        | L       | 9.03                          | 0.00349           | Overexpressed    |
| olfactomedin-4 precursor                                   | 32313593  | 3.0        | 34.3    | VL        | M       | 9.37                          | 0.00015           | Overexpressed    |
| maltase-glucoamylase, intestinal isoform X1                | 578814724 | 3.3        | 29.3    | VL        | M       | 9.55                          | 0.00024           | Overexpressed    |
| tetraspanin-1                                              | 21264578  | 0.3        | 3.0     | VL        | VL      | 11.00                         | 0.00074           | Overexpressed    |
| glutaminyl-peptide cyclotransferase precursor              | 6912618   | 0.3        | 3.0     | VL        | VL      | 12.77                         | 0.00074           | Overexpressed    |
| complement C3 precursor                                    | 115298678 | 2.7        | 62.3    | VL        | M       | 17.22                         | 0.00210           | Overexpressed    |
| lactoylglutathione lyase                                   | 118402586 | 1.3        | 17.0    | VL        | L       | 17.92                         | 0.00737           | Overexpressed    |
| neutrophil gelatinase-associated lipocalin precursor       | 38455402  | 0.7        | 19.3    | VL        | L       | 37.47                         | 0.00445           | Overexpressed    |
| polymeric immunoglobulin receptor isoform X1               | 530366266 | 0.3        | 28.0    | VL        | M       | 73.92                         | 0.00350           | Overexpressed    |

**Supplementary Table 2.** Differentially expressed proteins (DEPs) with the normalized spectral abundance factor (NSAF) ratio.

Group1: Healthy fertile Donors.

Group2:Patients with secondary infertility.

| Protein                                                  | accession | Average SC |         | Abundance |         | NSAF ratio      | T-Test   | Expression        |
|----------------------------------------------------------|-----------|------------|---------|-----------|---------|-----------------|----------|-------------------|
|                                                          |           | Group 1    | Group 8 | Group 1   | Group 8 | Group 8/Group 1 | P-value  |                   |
| semenogelin-2 precursor                                  | 4506885   | 1321.3     | 1310.0  | H         | H       | 0.54            | 0.001388 | Underexpressed    |
| semenogelin-1 preproprotein                              | 4506883   | 698.7      | 742.0   | H         | H       | 0.59            | 0.009700 | Underexpressed    |
| serotransferrin precursor                                | 4557871   | 63.3       | 214.3   | M         | H       | 1.52            | 0.009638 | Overexpressed     |
| alpha-1-antichymotrypsin precursor                       | 50659080  | 40.7       | 144.0   | M         | H       | 1.90            | 0.000762 | Overexpressed     |
| elongation factor 1-alpha 1                              | 4503471   | 20.3       | 56.7    | M         | M       | 2.02            | 0.000280 | Overexpressed     |
| 78 glucose-regulated protein precursor                   | 16507237  | 8.7        | 44.3    | L         | M       | 2.24            | 0.048217 | Overexpressed     |
| tubulin beta-4B chain                                    | 5174735   | 13.7       | 44.0    | L         | M       | 2.27            | 0.011258 | Overexpressed     |
| creatine kinase B-type                                   | 21536286  | 15.7       | 53.0    | L         | M       | 2.29            | 0.001589 | Overexpressed     |
| cytosolic non-specific dipeptidase isoform X2            | 530414265 | 8.7        | 32.0    | L         | M       | 2.37            | 0.040321 | Overexpressed     |
| transmembrane protease serine 2 isoform 2                | 205360943 | 8.0        | 34.0    | L         | M       | 2.46            | 0.004135 | Overexpressed     |
| annexin A1                                               | 4502101   | 7.7        | 33.0    | VL        | M       | 2.75            | 0.012865 | Overexpressed     |
| kallistatin isoform 2 precursor                          | 21361302  | 9.0        | 41.0    | L         | M       | 2.75            | 0.025892 | Overexpressed     |
| purine nucleoside phosphorylase                          | 157168362 | 4.7        | 24.0    | VL        | M       | 2.79            | 0.010691 | Overexpressed     |
| alpha-2-antiplasmin isoform X1                           | 578840157 | 11.0       | 46.0    | L         | M       | 2.90            | 0.016517 | Overexpressed     |
| receptor-type tyrosine-protein phosphatase S isoform X1  | 530425335 | 5.0        | 25.3    | VL        | M       | 2.92            | 0.019307 | Overexpressed     |
| annexin A2 isoform 1                                     | 50845388  | 4.7        | 20.0    | VL        | M       | 3.06            | 0.017794 | Overexpressed     |
| cullin-associated NEDD8-dissociated protein 1            | 21361794  | 4.3        | 26.3    | VL        | M       | 3.10            | 0.021171 | Overexpressed     |
| complement C4-A isoform 1 preproprotein                  | 67190748  | 7.3        | 49.7    | VL        | M       | 3.19            | 0.031549 | Overexpressed     |
| L-lactate dehydrogenase A chain isoform 1                | 5031857   | 5.0        | 25.3    | VL        | M       | 3.25            | 0.000981 | Overexpressed     |
| ras-related protein Rab-27A isoform X2                   | 530406261 | 3.0        | 18.0    | VL        | L       | 3.28            | 0.005380 | Overexpressed     |
| beta-hexosaminidase subunit alpha preproprotein          | 189181666 | 6.3        | 34.0    | VL        | M       | 3.50            | 0.001906 | Overexpressed     |
| ezrin                                                    | 21614499  | 2.0        | 9.7     | VL        | L       | 3.50            | 0.004375 | Overexpressed     |
| olfactomedin-4 precursor                                 | 32313593  | 3.0        | 25.0    | VL        | M       | 3.53            | 0.000465 | Overexpressed     |
| beta-galactosidase isoform b                             | 119372312 | 3.0        | 22.0    | VL        | M       | 3.57            | 0.002897 | Overexpressed     |
| tubulin alpha-1C chain                                   | 14389309  | 9.0        | 40.3    | L         | M       | 3.60            | 0.001176 | Overexpressed     |
| maltase-glucoamylase, intestinal isoform X1              | 578814724 | 3.3        | 29.0    | VL        | M       | 3.69            | 0.010355 | Overexpressed     |
| heat shock cognate 71 protein isoform X1                 | 578822169 | 3.0        | 27.7    | VL        | M       | 4.02            | 0.002540 | Overexpressed     |
| plastin-2 isoform X2                                     | 530402335 | 10.0       | 65.7    | L         | M       | 4.11            | 0.005525 | Overexpressed     |
| legumin preproprotein                                    | 56682962  | 3.0        | 21.0    | VL        | M       | 4.80            | 0.004225 | Overexpressed     |
| alpha-1-acid glycoprotein 2 precursor                    | 4505529   | 1.7        | 13.0    | VL        | L       | 4.87            | 0.005891 | Overexpressed     |
| lactoylglycathione lyase                                 | 118402586 | 1.3        | 11.0    | VL        | L       | 5.48            | 0.002352 | Overexpressed     |
| alpha-1B-glycoprotein precursor                          | 21071030  | 1.3        | 17.0    | VL        | L       | 6.11            | 0.002509 | Overexpressed     |
| laminin subunit alpha-5 isoform X1                       | 578835999 | 1.7        | 27.0    | VL        | M       | 7.06            | 0.021524 | Overexpressed     |
| lipocalin-15 precursor                                   | 42714611  | 0.7        | 10.0    | VL        | L       | 8.39            | 0.001023 | Overexpressed     |
| dipeptidase 3 isoform a precursor                        | 193211608 | 0.7        | 13.3    | VL        | L       | 10.10           | 0.002087 | Overexpressed     |
| complement C3 precursor                                  | 115298678 | 2.7        | 92.0    | VL        | H       | 15.37           | 0.004311 | Overexpressed     |
| programmed cell death 6-interacting protein isoform 1    | 22027538  | 0.7        | 21.0    | VL        | M       | 15.60           | 0.025954 | Overexpressed     |
| adenylyl cyclase-associated protein 1                    | 5453595   | 0.3        | 11.3    | VL        | L       | 22.01           | 0.001582 | Overexpressed     |
| polymeric immunoglobulin receptor isoform X1             | 530366266 | 0.3        | 29.0    | VL        | M       | 45.00           | 0.003562 | Overexpressed     |
| histone H2A type 2-A                                     | 4504251   | 0.3        | 18.0    | VL        | L       | 49.22           | 0.005117 | Overexpressed     |
| ferritin heavy chain                                     | 56682959  | 0.0        | 2.0     | ni        | VL      | Group 8 only    | 0.000023 | Unique to Group 8 |
| fructose-1,6-bisphosphatase 1                            | 16579888  | 0.0        | 6.7     | ni        | VL      | Group 8 only    | 0.000851 | Unique to Group 8 |
| nephronectin isoform A precursor                         | 296011067 | 0.0        | 6.0     | ni        | VL      | Group 8 only    | 0.000262 | Unique to Group 8 |
| transforming protein RhoA precursor                      | 10835049  | 0.0        | 2.0     | ni        | VL      | Group 8 only    | 0.000024 | Unique to Group 8 |
| ceruloplasmin precursor                                  | 4557485   | 0.0        | 9.3     | ni        | L       | Group 8 only    | 0.000125 | Unique to Group 8 |
| importin-5 isoform X2                                    | 530423350 | 0.0        | 12.0    | ni        | L       | Group 8 only    | 0.000152 | Unique to Group 8 |
| lysosomal Pro-X carboxypeptidase isoform 1 preproprotein | 4826940   | 0.0        | 10.3    | ni        | L       | Group 8 only    | 0.000232 | Unique to Group 8 |
| heat shock 70 protein 1-like isoform X1                  | 530381921 | 0.0        | 8.7     | ni        | L       | Group 8 only    | 0.000495 | Unique to Group 8 |
| carboxylesterase 5A isoform 1 precursor                  | 219521907 | 0.0        | 14.3    | ni        | L       | Group 8 only    | 0.000841 | Unique to Group 8 |
| kunitz-type protease inhibitor 1 isoform 1 precursor     | 32313599  | 0.0        | 8.0     | ni        | L       | Group 8 only    | 0.003919 | Unique to Group 8 |
| myosin-9                                                 | 12667788  | 0.0        | 17.0    | ni        | L       | Group 8 only    | 0.004667 | Unique to Group 8 |
| amyloid beta A4 protein isoform f precursor              | 209915573 | 0.0        | 8.3     | ni        | L       | Group 8 only    | 0.006708 | Unique to Group 8 |
| alpha-crystallin A chain-like isoform X1                 | 578836360 | 0.0        | 51.3    | ni        | M       | Group 8 only    | 0.045285 | Unique to Group 8 |
